# Supplementary material
Source: PubMed Central journal article supplement (PMC1989158)

**Supplemental Figure 1**

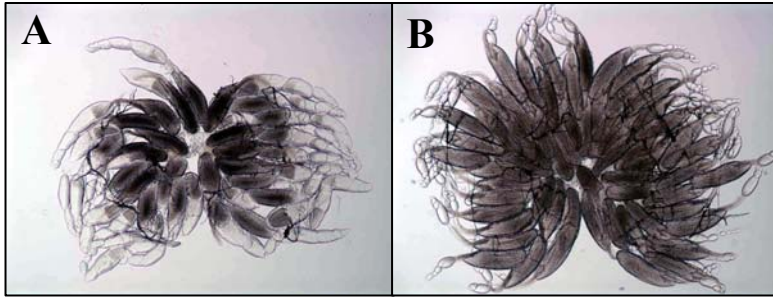

Supplement: NIHMS25931-supplement-02.pdf [file NIHMS25931-supplement-02.pdf]

**Supplemental Figure 2**

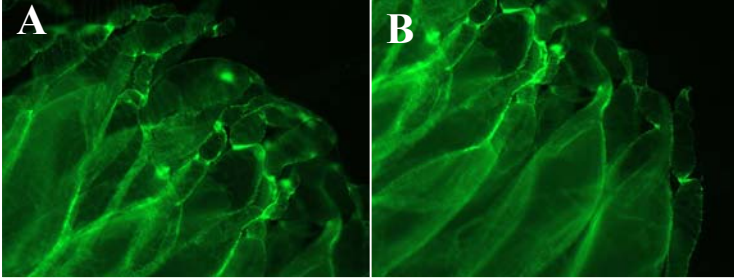

Supplement: NIHMS25931-supplement-03.pdf [file NIHMS25931-supplement-03.pdf]

**Supplemental Figure 3**

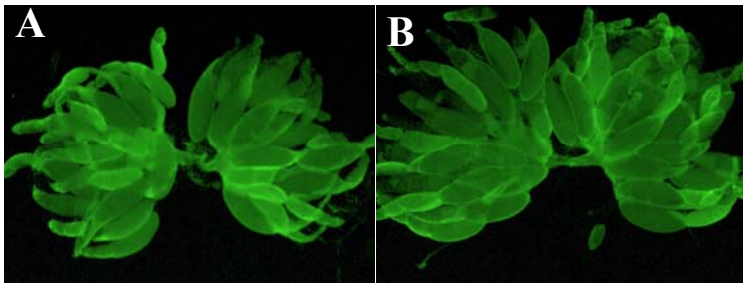

Supplement: NIHMS25931-supplement-04.pdf [file NIHMS25931-supplement-04.pdf]
